# Supplementary material for: Intrinsic electronic spectra of cryogenically prepared protoporphyrin IX ions in vacuo – deprotonation-induced Stark shifts
Source: Royal Society of Chemistry journal article supplement (doi:10.1039/d0cp03614e), 2020-01-01

# Intrinsic Electronic Spectra of Cryogenically Prepared Protoporphyrin IX Ions in Vacuo – Deprotonation-Induced Stark Shifts – Electronic Supplementary Information

Wyatt Zagorec-Marks,<sup>1,2</sup> James E. T. Smith<sup>2</sup>, Madison M. Foreman,<sup>1,2</sup> Sandeep Sharma<sup>2</sup>, J. Mathias Weber<sup>1,2,\*</sup>

<sup>1</sup>JILA, University of Colorado, Boulder, CO 80309, USA.

<sup>2</sup>Department of Chemistry, University of Colorado, Boulder, CO 80309, USA.

## Table of Contents

|                                                                                                                           |    |
|---------------------------------------------------------------------------------------------------------------------------|----|
| <b>S1. Correlated Calculations</b> .....                                                                                  | 2  |
| <b>Figure S1.1.</b> A visual comparison of the theoretical and experimental Q <sub>x</sub> and Q <sub>y</sub> bands. .... | 2  |
| <b>Figure S1.2</b> The anion natural orbitals (NOs) from the SA-3-CASSCF(4e,4o) calculation. ....                         | 3  |
| <b>Figure S1.3</b> The leading configurations in the CI expansion for the anion ground state.....                         | 3  |
| <b>Figure S1.4</b> The leading configurations in the CI expansion for the anion Q <sub>x</sub> (S1) state.....            | 4  |
| <b>Figure S1.5</b> The leading configurations in the CI expansion for the anion Q <sub>y</sub> (S2) state.....            | 4  |
| <b>Figure S1.6</b> The dianion natural orbitals (NOs) from the SA-3-CASSCF(4e,4o) calculation. .                          | 5  |
| <b>Figure S1.7</b> The leading configurations in the CI expansion for the dianion ground state. ....                      | 5  |
| <b>Figure S1.8</b> The leading configurations in the CI expansion for the dianion Q <sub>x</sub> (S1) state.....          | 6  |
| <b>Figure S1.9</b> The leading configurations in the CI expansion for the dianion Q <sub>y</sub> (S2) state.....          | 6  |
| <b>S2. Model Protoporphyrin (PP-Me) Calculations</b> .....                                                                | 7  |
| <b>Figure S2.1.</b> Structure of PP-Me, used to investigate electric field effects .....                                  | 7  |
| <b>Table S2.2</b> Summary of the point charge locations and their standard deviations .....                               | 8  |
| <b>Table S2.3</b> Experimental and simulated effects of charge state.....                                                 | 9  |
| <b>S3. Frank-Condon Simulation of Free Base Porphyrin</b> .....                                                           | 10 |
| <b>S4. Solvatochromic Data</b> .....                                                                                      | 11 |
| <b>S5. Mid-Infrared Spectra of PP</b> .....                                                                               | 12 |
| <b>S6. Frequencies and Intensities of Vibrational modes of the Q<sub>x</sub> Band of Porphine</b> .....                   | 13 |
| <b>S7. Frequencies and Intensities of Vibrational modes of the Q<sub>x</sub> Band of (PP-H)<sup>-</sup></b> .....         | 16 |
| <b>S8. Assignment of FCHT simulation of (PP-H)<sup>-</sup> under vertical gradient approximation</b> ....                 | 18 |

# S1. Correlated Calculations

All PySCF input files along with selected analysis scripts are hosted on GitHub at [https://github.com/jamesETsmith/ppix\\_final](https://github.com/jamesETsmith/ppix_final).

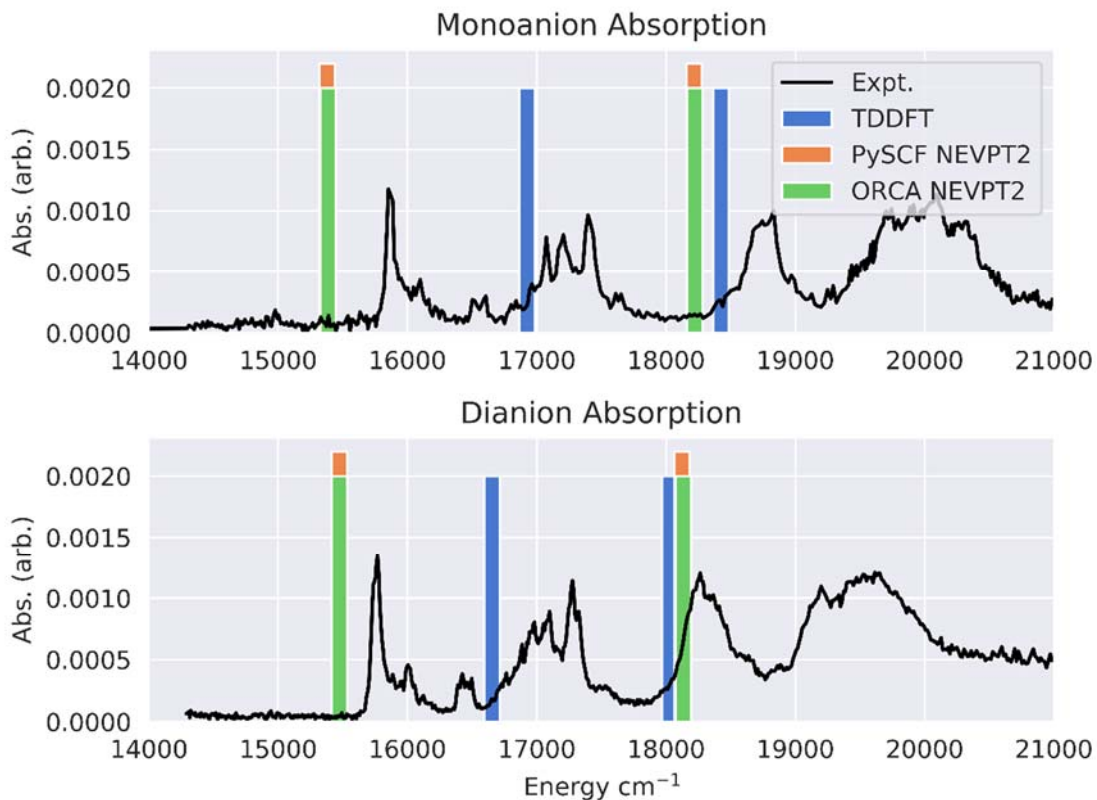

**Figure S1.1.** A visual comparison of the theoretical and experimental Qx and Qy bands. We make the PySCF NEVPT2 results slightly taller here to facilitate the comparison with the ORCA NEVPT2 results.

HONO-1

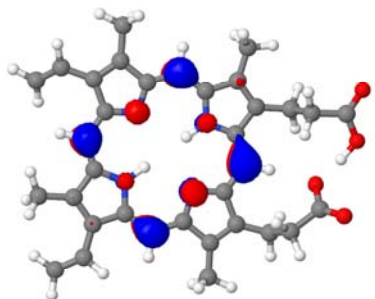

HONO

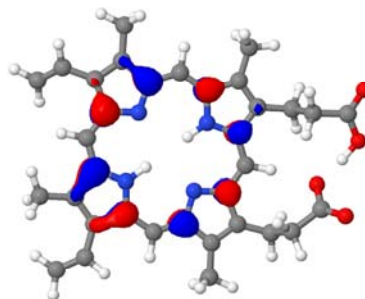

LUNO

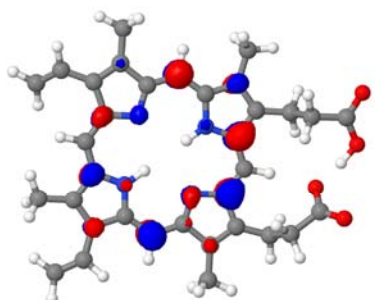

LUNO+1

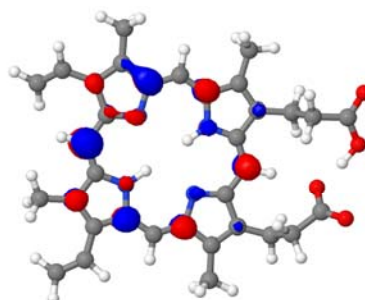

Figure S1.2 The anion natural orbitals (NOs) from the SA-3-CASSCF(4e,4o) calculation.

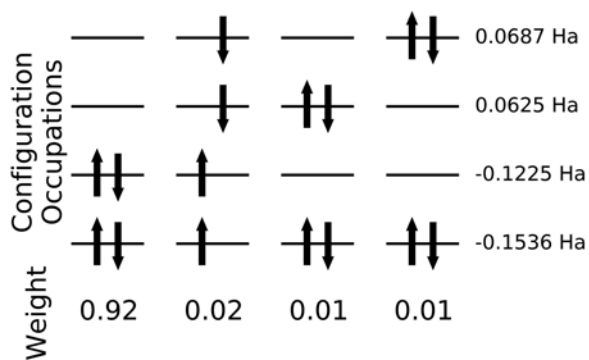

Figure S1.3 The leading configurations in the CI expansion for the anion ground state.

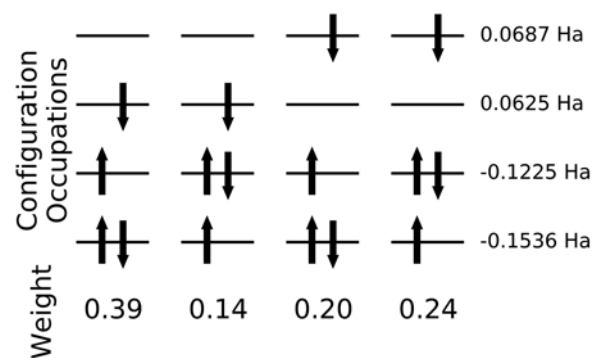

**Figure S1.4** The leading configurations in the CI expansion for the anion  $Q_x$  (S1) state.

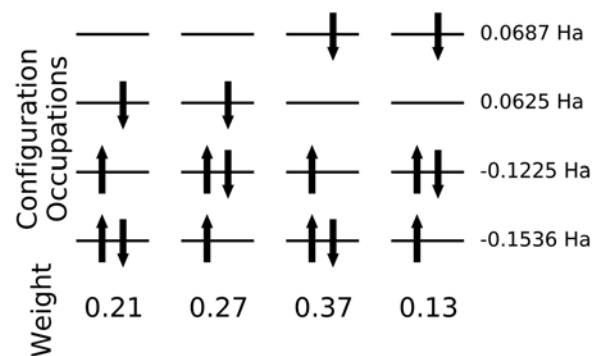

**Figure S1.5** The leading configurations in the CI expansion for the anion  $Q_y$  (S2) state.

HONO-1

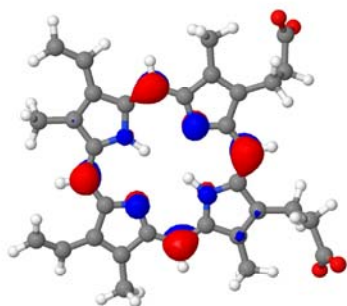

HONO

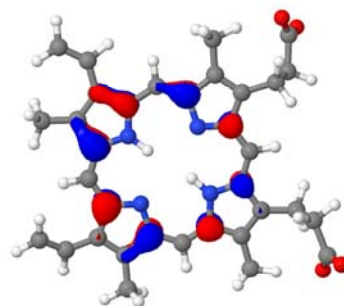

LUNO

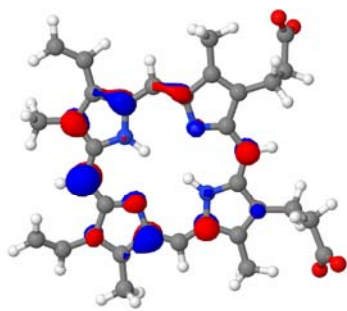

LUNO+1

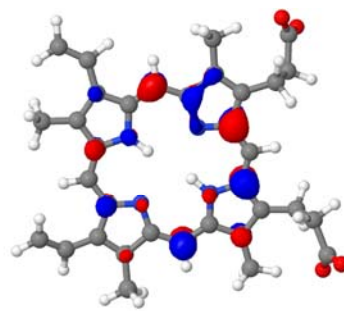

Figure S1.6 The dianion natural orbitals (NOs) from the SA-3-CASSCF(4e,4o) calculation.

|               |      |      |      |      |            |
|---------------|------|------|------|------|------------|
|               | —    | ↓    | —    | ↑↓   | 0.1390 Ha  |
|               | —    | ↓    | ↑↓   | —    | 0.1312 Ha  |
| Configuration | ↑↓   | ↑    | —    | —    | -0.0528 Ha |
| Occupations   | ↑↓   | ↑    | ↑↓   | ↑↓   | -0.0854 Ha |
| Weight        | 0.92 | 0.02 | 0.01 | 0.01 |            |

Figure S1.7 The leading configurations in the CI expansion for the dianion ground state.

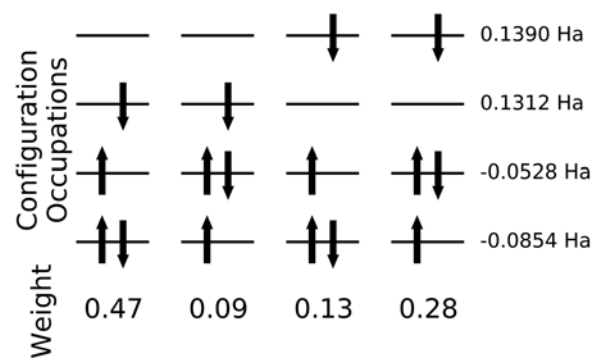

**Figure S1.8** The leading configurations in the CI expansion for the dianion  $Q_x$  (S1) state.

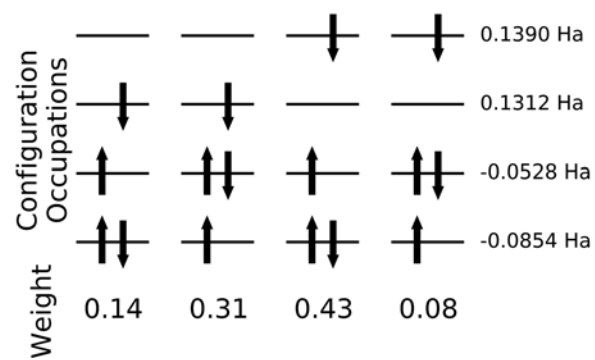

**Figure S1.9** The leading configurations in the CI expansion for the dianion  $Q_y$  (S2) state.

## S2. Model Protoporphyrin (PP-Me) Calculations

Since the NEVPT2 calculations on PP are in good agreement with the experimentally observed splittings, an interesting question in this context is whether NEVPT2 can reproduce the field effects for a simplified model structure that is placed in the field of point charges that approximate the charge distribution of the ions. We calculated the  $Q_x$  and  $Q_y$  band energies using a modified molecular structure (in the following referred to as PP-Me), where we replaced the charged  $(\text{CH}_2)_2\text{COO}(\text{H})$  groups on PP with methyl groups, and placed point charges at different positions to simulate the electric field experienced by the macrocycle in a variety of scenarios. The structure of the macrocycle model was optimized using the  $\omega\text{B97XD}$  functional with 6-31G(d) basis set for all atoms. Figure S2.1 shows the geometry used in these simulations, with three different charge distributions for the monoanion and one for the dianion.

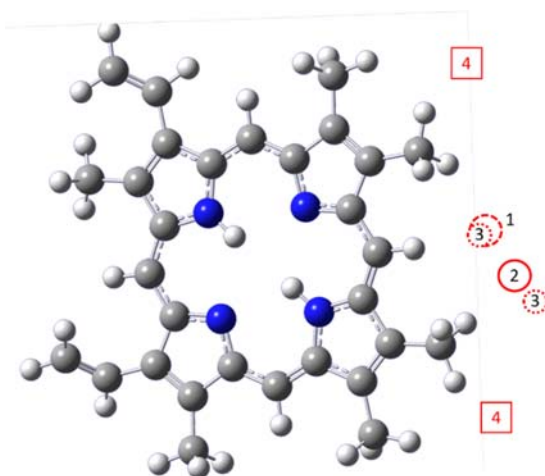

**Figure S2.1.** Structure of PP-Me, used to investigate electric field effects. Positions marked with numbers represent point charge positions: single point charges ( $-e$ ) were used in positions 1 and 2, two point charges ( $-0.5 e$ ) in each position marked “3”, each configuration simulating a charge distribution modeling the monoanion, and two point charges ( $-e$ ) in each position marked “4” to simulate the dianion structure.

In scenario 1, a point charge of  $-e$  is positioned at the location of the deprotonated carboxylate oxygen atom (relative to the macrocycle). In the second scenario, a point charge of  $-e$  is placed at the position of the H atom shared between the two carboxylate groups. In the third scenario, two point charges of  $-0.5 e$  each are set in the locations of the oxygen atoms involved in the H-bonding between the carboxylate groups. The fourth model charge distribution uses the midpoint between the two oxygen atoms on each carboxylate group as a model for the dianion.

For each scenario, we calculate the position (or positions depending on the scenario) of the point charges using the following procedure:

1. Choose a position for the point charge, e.g. the location of the hydrogen H-bonded between the carboxylate groups in the PP anion.
2. Measure the distance from the point charge to four non-H-atoms, which we refer to as reference atoms, on the porphyrin ring in the PP species.
3. Use the distances and the positions of the same four reference atoms in the PP-Me geometry to calculate the position of the point charge(s) in the new geometry
4. Repeat steps 1-3 for every possible combination of non-H-atoms around the porphyrin ring and take the mean of all coordinates as our point charge location in the correlated calculations.

A summary of the point charge locations and their standard deviations is listed below. All values are in Å.

**Table S2.2 Point Charge Coordinates for Model Calculations**

| Scenario | Charge | X                | Y                | Z                |
|----------|--------|------------------|------------------|------------------|
| 1        | -1.0   | -5.7124 ± 0.1298 | -3.6452 ± 0.0610 | 0.1326 ± 0.5764  |
| 2        | -1.0   | -7.0947 ± 0.1190 | -3.0432 ± 0.0676 | 0.1083 ± 0.6237  |
| 3        | -0.5   | -5.7124 ± 0.1298 | -3.6452 ± 0.0610 | 0.1326 ± 0.5764  |
|          | -0.5   | -8.0172 ± 0.1534 | -2.5559 ± 0.0935 | 0.0854 ± 0.7135  |
| 4        | -1.0   | -2.9263 ± 0.2368 | -7.4737 ± 0.2686 | -0.3309 ± 1.8030 |
|          | -1.0   | -8.1490 ± 0.2285 | 1.2438 ± 0.1640  | 0.4364 ± 1.5091  |

Table S2.2 shows the results of these model calculations in terms of the predicted  $Q_x$  and  $Q_y$  energies. Scenarios 1, 2, and 3 result in similar band energies. Their calculated band energies and splittings are loosely consistent with the calculated results on singly deprotonated PP, but they do not recover the changes observed in going from the mono- to the dianion. The spread of excitation energies from our scenarios indicates that the band positions are quite sensitive to the charge distribution, corroborating our expectation that the local electric field plays a major role for the behavior of the Q band positions. The various scenarios agree qualitatively with the experimental pattern, but they all consistently overestimate the  $Q_x$  band energies, while underestimating the  $Q_y$  energies. Clearly, the treatment using point charges in the vicinity of a simplified model macrocycle is insufficient to correctly account for the Stark shifts. We caution that the geometries of the PP-Me model structure and the deprotonated PP structures differ sufficiently strongly to introduce uncertainties in the positions of the point charges, depending on which atoms in the macrocycle are chosen as reference atoms. This uncertainty introduces possible errors regarding the electric field experienced by the atoms closest to the charges. These errors range from ca. 5% for the monoanion to ca. 15% for the dianion.



**Table S2.3** Experimental and simulated effects of charge state. Vertical transition energies in  $\text{cm}^{-1}$ .

| Charge State | Molecule | Method                    | $E(Q_x)^{(d)}$  | $E(Q_y)^{(d)}$  | $\Delta E^{(d)}$ |
|--------------|----------|---------------------------|-----------------|-----------------|------------------|
| 0            | PP       | experiment <sup>(a)</sup> | $15900 \pm 100$ | $19050 \pm 100$ | $3150 \pm 141$   |
|              | PP       | NEVPT2                    | 15810           | 18606           | 2796             |
| -1           | PP       | experiment <sup>(b)</sup> | $15870 \pm 10$  | $18760 \pm 30$  | $2890 \pm 32$    |
|              | PP       | NEVPT2                    | 15377           | 18217           | 2840             |
|              | PP-Me    | NEVPT2(1) <sup>(c)</sup>  | 16072           | 18530           | 2457             |
|              | PP-Me    | NEVPT2(2) <sup>(c)</sup>  | 16155           | 18656           | 2501             |
|              | PP-Me    | NEVPT2(3) <sup>(c)</sup>  | 16110           | 18640           | 2530             |
| -2           | PP       | experiment <sup>(b)</sup> | $15760 \pm 10$  | $18270 \pm 30$  | $2510 \pm 32$    |
|              |          |                           | (-110)          | (-490)          | (-380)           |
|              | PP       | NEVPT2                    | 15472           | 18123           | 2651             |
|              |          |                           | (+95)           | (-94)           | (-189)           |
|              | PP-Me    | NEVPT2(4) <sup>(c)</sup>  | 16152           | 18702           | 2550             |
|              |          |                           | (+40)           | (+93)           | (-54)            |

<sup>(a)</sup>Supersonic jet experiment, from ref 16.

<sup>(b)</sup>This work.

<sup>(c)</sup>Numbers in parentheses refer to the placement of point charges in Figure 5.

<sup>(d)</sup>Numbers in parentheses describe the shift from mon- to dianion. For scenario 4, the shift is calculated relative to the average of the scenarios 1-3.

### S3. Frank-Condon Simulation of Porphine

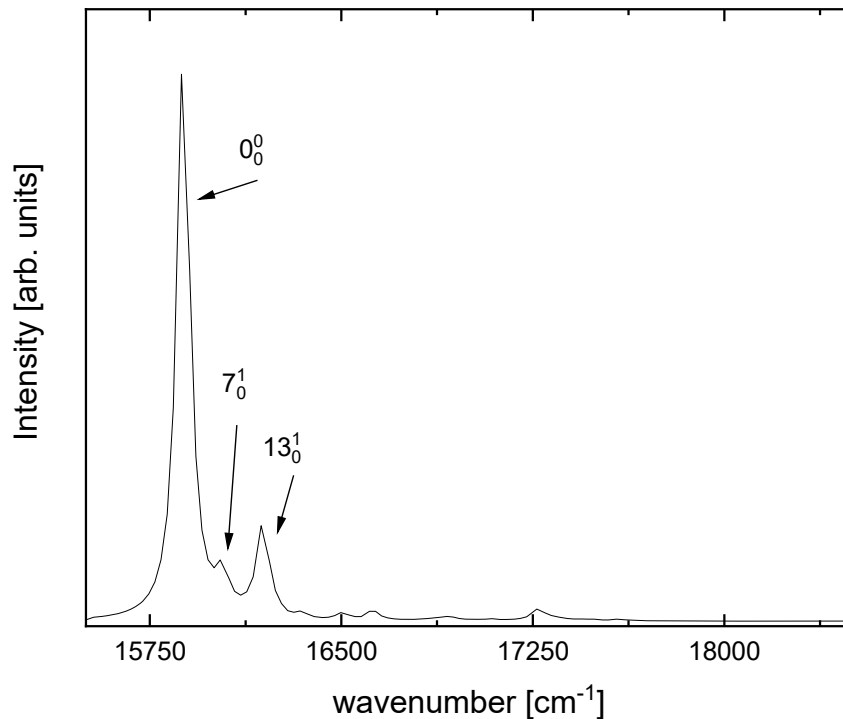

Franck-Condon simulation of the Q<sub>x</sub> band, performed using the  $\omega$ B97XD/6-31G(d) level of theory (black), with a scaling factor of 0.97 to account for anharmonicity. The 7<sub>0</sub><sup>1</sup> band at 77 cm<sup>-1</sup> is a macrocycle deformation mode where elongation along the x-axis is out of phase with elongation along the y-axis. The in-phase combination of these motions is the 13<sub>0</sub><sup>1</sup> band and is responsible for the peak at 227 cm<sup>-1</sup>. See PowerPoint file in Supporting Information for animation of key vibrational modes.

## S4. Solvatochromic Data

**Table S4.** Solvatochromic data for PP (transition energies in  $\text{cm}^{-1}$ )

| Solvent / Temperature | pH (charge) | $Q_x(0)^{(a)}$  | $Q_x(1)^{(a)}$  | $Q_y(0)^{(a)}$  | $Q_y(1)^{(a)}$  | ref. <sup>(b)</sup> |
|-----------------------|-------------|-----------------|-----------------|-----------------|-----------------|---------------------|
| in vacuo / jet        | (0)         | $15900 \pm 100$ | $17420 \pm 100$ | $19050 \pm 100$ | $20410 \pm 100$ | 16                  |
| in vacuo / 60         | (-1)        | $15870 \pm 10$  | $17400 \pm 10$  | $18760 \pm 30$  | $20090 \pm 20$  | This work           |
| in vacuo / RT         | (-1)        | N/A             | $17210 \pm 100$ | $18690 \pm 100$ | $20040 \pm 100$ | 15                  |
| in vacuo / 60         | (-2)        | $15760 \pm 10$  | $17280 \pm 10$  | $18270 \pm 30$  | $19630 \pm 30$  | This work           |
| water / RT            | 1           | 15870           | 16670           | 18050           | 19380           | 14                  |
| water / RT            | 5           | 15530           | 16840           | 17670           | 18730           | 14                  |
| water / RT            | 12          | 15970           | 17300           | 18350           | 19610           | 14                  |
| DMSO / RT             | N/A         | 15870           | 17330           | 18450           | 19760           | 14                  |

<sup>(a)</sup>  $Q_x(0)$  and  $Q_y(0)$  refer to the maximum of each envelope in the band origin region, while  $Q_x(1)$  and  $Q_y(1)$  represent the maxima of the envelope in the region of Franck-Condon active modes, ca.  $1000 \text{ cm}^{-1}$  above each band origin.

<sup>(b)</sup> Reference numbers refer to the main text.

## S5. Mid-Infrared Spectra of PP

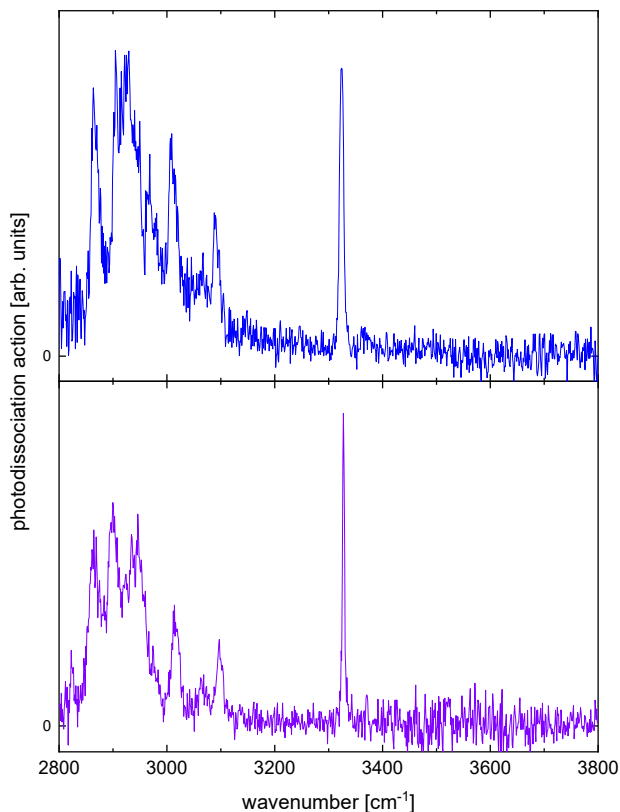

**Figure S5.** Mid-infrared spectra of  $[(PP-H)\cdot N_2]^-$  (top panel) and of  $[(PP-2H)\cdot N_2]^{2-}$  (bottom).

Both spectra show the anti-symmetric NH stretching vibration as intense features at  $3324\text{ cm}^{-1}$  and  $3327\text{ cm}^{-1}$ , respectively. A subtle feature at  $3368\text{ cm}^{-1}$  in the spectrum of the monoanion corresponds to the symmetric stretching mode, which is too weak to be clearly observable in the dianion spectrum. The features below  $3200\text{ cm}^{-1}$  are CH stretching vibrations as well as Fermi-resonances of these modes with overtones and combination bands of lower frequency modes. We refrain from explicitly assigning any of these modes due to the high congestion in this region. There is no evidence of a free OH stretching vibration in the spectrum of the monoanion, confirming that the hydrogen is shared between the two carboxylate groups (see Figure 3 in the main text).

## S6. Frequencies and Intensities of Vibrational modes of the Q<sub>x</sub> Band of Porphine

| Transition # | Label                                     | Frequency (1/cm) | Rel. Frequency (1/cm) | Line Intensity | Dipole Strength (a.u.) |
|--------------|-------------------------------------------|------------------|-----------------------|----------------|------------------------|
| 1            | $ 0\rangle \rightarrow  0\rangle$         | 17562.24         | 0                     | 2442           | 0.01864                |
| 2            | $ 0\rangle \rightarrow  3^1\rangle$       | 17657.98         | 95.7363               | 84.48          | 0.000684               |
| 3            | $ 0\rangle \rightarrow  7^1\rangle$       | 17715.08         | 152.8403              | 415.6          | 0.003146               |
| 4            | $ 0\rangle \rightarrow  7^2\rangle$       | 17867.92         | 305.6807              | 21.36          | 0.000161               |
| 5            | $ 0\rangle \rightarrow  13^1\rangle$      | 17873.52         | 311.2789              | 561.5          | 0.004458               |
| 6            | $ 0\rangle \rightarrow  20^1\rangle$      | 17984.46         | 422.2208              | 36.3           | 0.000282               |
| 7            | $ 0\rangle \rightarrow  13^{17^1}\rangle$ | 18026.36         | 464.1193              | 87.83          | 0.000653               |
| 8            | $ 0\rangle \rightarrow  13^2\rangle$      | 18184.8          | 622.5579              | 61.75          | 0.000477               |
| 9            | $ 0\rangle \rightarrow  33^1\rangle$      | 18295.81         | 733.5661              | 511.6          | 0.003877               |
| 10           | $ 0\rangle \rightarrow  34^1\rangle$      | 18302.44         | 740.2007              | 277.9          | 0.002074               |
| 11           | $ 0\rangle \rightarrow  41^1\rangle$      | 18361.27         | 799.0247              | 201            | 0.001548               |
| 12           | $ 0\rangle \rightarrow  33^{17^1}\rangle$ | 18448.65         | 886.4064              | 29.75          | 0.000226               |
| 13           | $ 0\rangle \rightarrow  34^{17^1}\rangle$ | 18455.29         | 893.0411              | 27.27          | 0.000204               |
| 14           | $ 0\rangle \rightarrow  53^1\rangle$      | 18539.89         | 977.6411              | 815            | 0.005909               |
| 15           | $ 0\rangle \rightarrow  55^1\rangle$      | 18553.53         | 991.2886              | 345            | 0.002639               |
| 16           | $ 0\rangle \rightarrow  58^1\rangle$      | 18585.71         | 1023.462              | 286.4          | 0.002193               |
| 17           | $ 0\rangle \rightarrow  59^1\rangle$      | 18593.21         | 1030.962              | 49.16          | 0.000373               |
| 18           | $ 0\rangle \rightarrow  33^113^1\rangle$  | 18607.09         | 1044.845              | 79.02          | 0.000584               |
| 19           | $ 0\rangle \rightarrow  34^113^1\rangle$  | 18613.72         | 1051.48               | 51.54          | 0.000376               |
| 20           | $ 0\rangle \rightarrow  61^1\rangle$      | 18624.8          | 1062.551              | 498.1          | 0.003755               |
| 21           | $ 0\rangle \rightarrow  63^1\rangle$      | 18634.17         | 1071.928              | 23.43          | 0.00018                |
| 22           | $ 0\rangle \rightarrow  41^113^1\rangle$  | 18672.55         | 1110.304              | 32.18          | 0.000241               |
| 23           | $ 0\rangle \rightarrow  53^17^1\rangle$   | 18692.73         | 1130.481              | 42.9           | 0.00031                |
| 24           | $ 0\rangle \rightarrow  55^17^1\rangle$   | 18706.37         | 1144.129              | 23.3           | 0.000167               |
| 25           | $ 0\rangle \rightarrow  65^1\rangle$      | 18721.65         | 1159.405              | 289.4          | 0.002198               |
| 26           | $ 0\rangle \rightarrow  58^17^1\rangle$   | 18738.55         | 1176.303              | 23.85          | 0.000171               |
| 27           | $ 0\rangle \rightarrow  68^1\rangle$      | 18771.65         | 1209.407              | 1103           | 0.007893               |
| 28           | $ 0\rangle \rightarrow  69^1\rangle$      | 18772.34         | 1210.099              | 58.65          | 0.000421               |
| 29           | $ 0\rangle \rightarrow  61^17^1\rangle$   | 18777.64         | 1215.392              | 33.17          | 0.000251               |
| 30           | $ 0\rangle \rightarrow  70^1\rangle$      | 18806.31         | 1244.064              | 866.9          | 0.006291               |

|    |                                               |          |          |       |          |
|----|-----------------------------------------------|----------|----------|-------|----------|
| 31 | $ 0\rangle \rightarrow  53^1 13^1\rangle$     | 18851.16 | 1288.92  | 120.4 | 0.000857 |
| 32 | $ 0\rangle \rightarrow  55^1 13^1\rangle$     | 18864.81 | 1302.568 | 55.22 | 0.000411 |
| 33 | $ 0\rangle \rightarrow  65^1 7^1\rangle$      | 18874.49 | 1312.245 | 19.6  | 0.000139 |
| 34 | $ 0\rangle \rightarrow  58^1 13^1\rangle$     | 18896.99 | 1334.741 | 49.6  | 0.00037  |
| 35 | $ 0\rangle \rightarrow  68^1 7^1\rangle$      | 18924.49 | 1362.248 | 74.13 | 0.000528 |
| 36 | $ 0\rangle \rightarrow  74^1\rangle$          | 18930.55 | 1368.304 | 1237  | 0.008754 |
| 37 | $ 0\rangle \rightarrow  61^1 13^1\rangle$     | 18936.07 | 1373.83  | 80.68 | 0.000593 |
| 38 | $ 0\rangle \rightarrow  75^1\rangle$          | 18953.21 | 1390.962 | 2642  | 0.01968  |
| 39 | $ 0\rangle \rightarrow  76^1\rangle$          | 18953.69 | 1391.444 | 1275  | 0.009568 |
| 40 | $ 0\rangle \rightarrow  70^1 7^1\rangle$      | 18959.15 | 1396.905 | 54.83 | 0.000398 |
| 41 | $ 0\rangle \rightarrow  78^1\rangle$          | 18974.28 | 1412.032 | 2012  | 0.01447  |
| 42 | $ 0\rangle \rightarrow  81^1\rangle$          | 19011.95 | 1449.703 | 86.24 | 0.00061  |
| 43 | $ 0\rangle \rightarrow  65^1 13^1\rangle$     | 19032.93 | 1470.683 | 46.34 | 0.000343 |
| 44 | $ 0\rangle \rightarrow  83^1\rangle$          | 19050.25 | 1488.006 | 55.36 | 0.00039  |
| 45 | $ 0\rangle \rightarrow  68^1 13^1\rangle$     | 19082.93 | 1520.686 | 178.4 | 0.001254 |
| 46 | $ 0\rangle \rightarrow  74^1 7^1\rangle$      | 19083.39 | 1521.144 | 78.73 | 0.000554 |
| 47 | $ 0\rangle \rightarrow  75^1 7^1\rangle$      | 19106.05 | 1543.803 | 188.9 | 0.001415 |
| 48 | $ 0\rangle \rightarrow  76^1 7^1\rangle$      | 19106.53 | 1544.284 | 86.25 | 0.000605 |
| 49 | $ 0\rangle \rightarrow  70^1 13^1\rangle$     | 19117.59 | 1555.343 | 138.1 | 0.00098  |
| 50 | $ 0\rangle \rightarrow  86^1\rangle$          | 19119.79 | 1557.541 | 76.89 | 0.000557 |
| 51 | $ 0\rangle \rightarrow  78^1 7^1\rangle$      | 19127.12 | 1564.873 | 127.2 | 0.000915 |
| 52 | $ 0\rangle \rightarrow  87^1\rangle$          | 19129.04 | 1566.798 | 605.2 | 0.004457 |
| 53 | $ 0\rangle \rightarrow  90^1\rangle$          | 19175.17 | 1612.931 | 1720  | 0.01235  |
| 54 | $ 0\rangle \rightarrow  91^1\rangle$          | 19203.18 | 1640.937 | 5346  | 0.03734  |
| 55 | $ 0\rangle \rightarrow  93^1\rangle$          | 19241.68 | 1679.44  | 2467  | 0.01824  |
| 56 | $ 0\rangle \rightarrow  74^1 13^1\rangle$     | 19241.83 | 1679.583 | 184.1 | 0.001364 |
| 57 | $ 0\rangle \rightarrow  75^1 13^1\rangle$     | 19264.49 | 1702.241 | 440.1 | 0.003194 |
| 58 | $ 0\rangle \rightarrow  76^1 13^1\rangle$     | 19264.97 | 1702.723 | 204.1 | 0.001491 |
| 59 | $ 0\rangle \rightarrow  87^1 7^1\rangle$      | 19281.88 | 1719.639 | 33.86 | 0.000251 |
| 60 | $ 0\rangle \rightarrow  78^1 13^1\rangle$     | 19285.56 | 1723.311 | 320.4 | 0.002254 |
| 61 | $ 0\rangle \rightarrow  90^1 7^1\rangle$      | 19328.01 | 1765.771 | 114.5 | 0.000824 |
| 62 | $ 0\rangle \rightarrow  91^1 7^1\rangle$      | 19356.02 | 1793.777 | 339.9 | 0.002362 |
| 63 | $ 0\rangle \rightarrow  93^1 7^1\rangle$      | 19394.52 | 1832.28  | 168.2 | 0.001163 |
| 64 | $ 0\rangle \rightarrow  75^1 13^1 7^1\rangle$ | 19417.33 | 1855.082 | 31.53 | 0.00023  |
| 65 | $ 0\rangle \rightarrow  78^1 13^1 7^1\rangle$ | 19438.4  | 1876.152 | 20.81 | 0.000146 |
| 66 | $ 0\rangle \rightarrow  87^1 13^1\rangle$     | 19440.32 | 1878.077 | 92.67 | 0.000665 |

|     |                                                |            |           |       |           |
|-----|------------------------------------------------|------------|-----------|-------|-----------|
| 67  | $ 0\rangle \rightarrow  90^1 13^1\rangle$      | 19486.45   | 1924.209  | 277.5 | 0.001946  |
| 68  | $ 0\rangle \rightarrow  68^1 34^1\rangle$      | 19511.85   | 1949.608  | 22.9  | 0.000163  |
| 69  | $ 0\rangle \rightarrow  91^1 13^1\rangle$      | 19514.46   | 1952.215  | 847.1 | 0.005817  |
| 70  | $ 0\rangle \rightarrow  93^1 13^1\rangle$      | 19552.96   | 1990.719  | 393   | 0.002829  |
| 71  | $ 0\rangle \rightarrow  75^1 13^2\rangle$      | 19575.76   | 2013.52   | 34.41 | 0.000244  |
| 72  | $ 0\rangle \rightarrow  78^1 13^2\rangle$      | 19596.83   | 2034.59   | 24.16 | 0.000167  |
| 73  | $ 0\rangle \rightarrow  91^1 13^1 7^1\rangle$  | 19667.3    | 2105.056  | 55.31 | 0.000377  |
| 74  | $ 0\rangle \rightarrow  74^1 34^1\rangle$      | 19670.75   | 2108.505  | 21.18 | 0.000148  |
| 75  | $ 0\rangle \rightarrow  75^1 34^1\rangle$      | 19693.41   | 2131.163  | 67.57 | 0.000465  |
| 76  | $ 0\rangle \rightarrow  76^1 34^1\rangle$      | 19693.89   | 2131.645  | 23.35 | 0.000161  |
| 77  | $ 0\rangle \rightarrow  93^1 13^1 7^1\rangle$  | 19705.8    | 2143.559  | 25.45 | 0.000184  |
| 78  | $ 0\rangle \rightarrow  78^1 34^1\rangle$      | 19714.48   | 2152.233  | 35.84 | 0.000244  |
| 79  | $ 0\rangle \rightarrow  90^1 13^2\rangle$      | 19797.73   | 2235.488  | 21.11 | 0.000145  |
| 80  | $ 0\rangle \rightarrow  91^1 13^2\rangle$      | 19825.74   | 2263.494  | 59.84 | 0.00043   |
| 81  | $ 0\rangle \rightarrow  93^1 13^2\rangle$      | 19864.24   | 2301.998  | 29.52 | 0.000207  |
| 82  | $ 0\rangle \rightarrow  90^1 34^1\rangle$      | 19915.38   | 2353.131  | 35.51 | 0.000239  |
| 83  | $ 0\rangle \rightarrow  91^1 34^1\rangle$      | 19943.38   | 2381.137  | 90.94 | 0.000629  |
| 84  | $ 0\rangle \rightarrow  75^1 58^1\rangle$      | 19976.67   | 2414.424  | 29.89 | 0.00021   |
| 85  | $ 0\rangle \rightarrow  93^1 34^1\rangle$      | 19981.88   | 2419.641  | 44.97 | 0.000306  |
| 86  | $ 0\rangle \rightarrow  75^1 68^1\rangle$      | 20162.61   | 2600.37   | 44.38 | 0.000295  |
| 87  | $ 0\rangle \rightarrow  91^1 58^1\rangle$      | 20226.64   | 2664.399  | 26.31 | 0.000174  |
| 88  | $ 0\rangle \rightarrow  75^1 74^1\rangle$      | 20321.51   | 2759.266  | 22.81 | 0.000159  |
| 89  | $ 0\rangle \rightarrow  75^2\rangle$           | 20344.17   | 2781.924  | 83.43 | 0.000571  |
| 90  | $ 0\rangle \rightarrow  76^1 75^1\rangle$      | 20344.65   | 2782.406  | 25.31 | 0.000174  |
| 91  | $ 0\rangle \rightarrow  78^1 75^1\rangle$      | 20365.24   | 2802.995  | 39.59 | 0.000263  |
| 92  | $ 0\rangle \rightarrow  90^1 75^1\rangle$      | 20566.14   | 3003.893  | 54.75 | 0.000363  |
| 93  | $ 0\rangle \rightarrow  91^1 75^1\rangle$      | 20594.14   | 3031.899  | 97.6  | 0.000679  |
| 94  | $ 0\rangle \rightarrow  93^1 75^1\rangle$      | 20632.65   | 3070.402  | 48.47 | 0.000329  |
| 95  | $ 0\rangle \rightarrow  108^1\rangle$          | 21184.03   | 3621.786  | 20.65 | 0.000136  |
| 96  | $ 0\rangle \rightarrow  94^2\rangle$           | 21498.25   | 3936.008  | 125.8 | 0.000784  |
| 97  | $ 0\rangle \rightarrow  94^2 13^1\rangle$      | 21809.53   | 4247.287  | 28.83 | 0.000188  |
| 98  | $ 0\rangle \rightarrow  94^2 33^1\rangle$      | 22231.8183 | 4669.5743 | 26.16 | 0.0001631 |
| 99  | $ 0\rangle \rightarrow  94^2 53^1\rangle$      | 22475.8933 | 4913.6493 | 41.58 | 0.0002487 |
| 100 | $ 0\rangle \rightarrow  94^2 61^1\rangle$      | 22560.8036 | 4998.5596 | 25.39 | 0.000158  |
| 101 | $ 0\rangle \rightarrow  94^1 91^1 77^1\rangle$ | 22580.6571 | 5018.4131 | 36.32 | 0.0002169 |
| 102 | $ 0\rangle \rightarrow  94^1 91^1 84^1\rangle$ | 22670.7491 | 5108.5051 | 26.11 | 0.0001578 |

|     |                                              |            |           |       |           |
|-----|----------------------------------------------|------------|-----------|-------|-----------|
| 103 | $ 0\rangle \rightarrow  94^268^1\rangle$     | 22707.6596 | 5145.4156 | 56.16 | 0.0003322 |
| 104 | $ 0\rangle \rightarrow  94^270^1\rangle$     | 22742.3164 | 5180.0724 | 44.12 | 0.0002648 |
| 105 | $ 0\rangle \rightarrow  94^274^1\rangle$     | 22866.5559 | 5304.3119 | 62.86 | 0.0003684 |
| 106 | $ 0\rangle \rightarrow  94^275^1\rangle$     | 22889.2144 | 5326.9704 | 134.3 | 0.0008285 |
| 107 | $ 0\rangle \rightarrow  94^276^1\rangle$     | 22889.6963 | 5327.4523 | 64.78 | 0.0004027 |
| 108 | $ 0\rangle \rightarrow  94^278^1\rangle$     | 22910.2847 | 5348.0407 | 102.2 | 0.0006088 |
| 109 | $ 0\rangle \rightarrow  94^287^1\rangle$     | 23065.0506 | 5502.8066 | 30.71 | 0.0001876 |
| 110 | $ 0\rangle \rightarrow  94^290^1\rangle$     | 23111.1827 | 5548.9387 | 87.24 | 0.0005196 |
| 111 | $ 0\rangle \rightarrow  94^291^1\rangle$     | 23139.1887 | 5576.9447 | 271.1 | 0.001571  |
| 112 | $ 0\rangle \rightarrow  94^293^1\rangle$     | 23177.6920 | 5615.4480 | 125.1 | 0.0007677 |
| 113 | $ 0\rangle \rightarrow  94^291^113^1\rangle$ | 23450.4676 | 5888.2236 | 42.84 | 0.0002448 |

## S7. Frequencies and Intensities of Vibrational modes of the $Q_x$ Band of (PP-H)<sup>-</sup>

| Transition # | Label                                | Frequency (1/cm) | Rel. Frequency (1/cm) | Line Intensity | Dipole Strength (a.u.) |
|--------------|--------------------------------------|------------------|-----------------------|----------------|------------------------|
| 1            | $ 0\rangle \rightarrow  0\rangle$    | 9021.4701        | 0                     | 169.1          | 0.002512               |
| 2            | $ 0\rangle \rightarrow  1^1\rangle$  | 9041.2763        | 19.8062               | 402            | 0.006054               |
| 3            | $ 0\rangle \rightarrow  2^1\rangle$  | 9046.7473        | 25.2772               | 162.8          | 0.002416               |
| 4            | $ 0\rangle \rightarrow  3^1\rangle$  | 9055.3662        | 33.8961               | 129.4          | 0.001922               |
| 5            | $ 0\rangle \rightarrow  8^1\rangle$  | 9088.1167        | 66.6466               | 127.8          | 0.001899               |
| 6            | $ 0\rangle \rightarrow  17^1\rangle$ | 9137.0671        | 115.597               | 115.2          | 0.001713               |
| 7            | $ 0\rangle \rightarrow  42^1\rangle$ | 9345.4585        | 323.9884              | 101.9          | 0.001488               |
| 8            | $ 0\rangle \rightarrow  43^1\rangle$ | 9359.5519        | 338.0818              | 197.9          | 0.002848               |
| 9            | $ 0\rangle \rightarrow  46^1\rangle$ | 9394.9536        | 373.4835              | 247.8          | 0.003653               |
| 10           | $ 0\rangle \rightarrow  48^1\rangle$ | 9430.1697        | 408.6996              | 135.4          | 0.001925               |
| 11           | $ 0\rangle \rightarrow  49^1\rangle$ | 9449.678         | 428.2079              | 93.56          | 0.001353               |
| 12           | $ 0\rangle \rightarrow  52^1\rangle$ | 9513.9112        | 492.4411              | 133            | 0.001915               |
| 13           | $ 0\rangle \rightarrow  53^1\rangle$ | 9521.7206        | 500.2505              | 107.6          | 0.001545               |
| 14           | $ 0\rangle \rightarrow  54^1\rangle$ | 9532.3791        | 510.909               | 92.46          | 0.001369               |
| 15           | $ 0\rangle \rightarrow  61^1\rangle$ | 9640.4841        | 619.014               | 400.4          | 0.005622               |



|    |                                       |            |          |       |          |
|----|---------------------------------------|------------|----------|-------|----------|
| 16 | $ 0\rangle \rightarrow  63^1\rangle$  | 9667.9472  | 646.4771 | 129.8 | 0.001883 |
| 17 | $ 0\rangle \rightarrow  65^1\rangle$  | 9689.2071  | 667.737  | 102.9 | 0.001445 |
| 18 | $ 0\rangle \rightarrow  67^1\rangle$  | 9701.334   | 679.8639 | 756.6 | 0.01117  |
| 19 | $ 0\rangle \rightarrow  74^1\rangle$  | 9749.2372  | 727.7671 | 93.45 | 0.001371 |
| 20 | $ 0\rangle \rightarrow  76^1\rangle$  | 9768.1353  | 746.6652 | 136   | 0.00188  |
| 21 | $ 0\rangle \rightarrow  78^1\rangle$  | 9791.1663  | 769.6962 | 381.5 | 0.005239 |
| 22 | $ 0\rangle \rightarrow  79^1\rangle$  | 9795.8846  | 774.4145 | 155.3 | 0.002221 |
| 23 | $ 0\rangle \rightarrow  82^1\rangle$  | 9814.2044  | 792.7343 | 101.7 | 0.00139  |
| 24 | $ 0\rangle \rightarrow  87^1\rangle$  | 9871.6158  | 850.1457 | 803.1 | 0.01096  |
| 25 | $ 0\rangle \rightarrow  101^1\rangle$ | 10022.5209 | 1001.051 | 209.5 | 0.002804 |
| 26 | $ 0\rangle \rightarrow  103^1\rangle$ | 10035.5796 | 1014.11  | 207.5 | 0.002886 |
| 27 | $ 0\rangle \rightarrow  118^1\rangle$ | 10172.9352 | 1151.465 | 122   | 0.001706 |
| 28 | $ 0\rangle \rightarrow  122^1\rangle$ | 10198.7353 | 1177.265 | 381.2 | 0.005018 |
| 29 | $ 0\rangle \rightarrow  123^1\rangle$ | 10215.8787 | 1194.409 | 360.6 | 0.004761 |
| 30 | $ 0\rangle \rightarrow  125^1\rangle$ | 10241.0716 | 1219.602 | 165.8 | 0.002201 |
| 31 | $ 0\rangle \rightarrow  126^1\rangle$ | 10245.9435 | 1224.473 | 211.5 | 0.002767 |
| 32 | $ 0\rangle \rightarrow  128^1\rangle$ | 10275.6357 | 1254.166 | 142.8 | 0.001941 |
| 33 | $ 0\rangle \rightarrow  131^1\rangle$ | 10311.562  | 1290.092 | 971   | 0.01268  |
| 34 | $ 0\rangle \rightarrow  134^1\rangle$ | 10334.1165 | 1312.646 | 111   | 0.001441 |
| 35 | $ 0\rangle \rightarrow  136^1\rangle$ | 10347.8419 | 1326.372 | 369.7 | 0.005004 |
| 36 | $ 0\rangle \rightarrow  141^1\rangle$ | 10395.0622 | 1373.592 | 121   | 0.001614 |
| 37 | $ 0\rangle \rightarrow  142^1\rangle$ | 10396.5576 | 1375.088 | 238.4 | 0.003244 |
| 38 | $ 0\rangle \rightarrow  145^1\rangle$ | 10413.5682 | 1392.098 | 191.5 | 0.002465 |
| 39 | $ 0\rangle \rightarrow  146^1\rangle$ | 10424.885  | 1403.415 | 828.5 | 0.01079  |
| 40 | $ 0\rangle \rightarrow  149^1\rangle$ | 10467.9235 | 1446.453 | 135.9 | 0.00182  |
| 41 | $ 0\rangle \rightarrow  159^1\rangle$ | 10536.5956 | 1515.126 | 142.4 | 0.00183  |
| 42 | $ 0\rangle \rightarrow  161^1\rangle$ | 10546.4583 | 1524.988 | 255.9 | 0.003342 |
| 43 | $ 0\rangle \rightarrow  170^1\rangle$ | 10561.4592 | 1539.989 | 494.7 | 0.006387 |
| 44 | $ 0\rangle \rightarrow  172^1\rangle$ | 10570.9289 | 1549.459 | 103.5 | 0.001355 |
| 45 | $ 0\rangle \rightarrow  175^1\rangle$ | 10589.1221 | 1567.652 | 142.9 | 0.001926 |
| 46 | $ 0\rangle \rightarrow  176^1\rangle$ | 10610.6902 | 1589.22  | 296.3 | 0.003855 |
| 47 | $ 0\rangle \rightarrow  177^1\rangle$ | 10625.6609 | 1604.191 | 126.7 | 0.001629 |
| 48 | $ 0\rangle \rightarrow  178^1\rangle$ | 10638.2643 | 1616.794 | 283.6 | 0.003575 |
| 49 | $ 0\rangle \rightarrow  179^1\rangle$ | 10663.5007 | 1642.031 | 106.6 | 0.001345 |
| 50 | $ 0\rangle \rightarrow  181^1\rangle$ | 10671.3131 | 1649.843 | 399.5 | 0.005036 |
| 51 | $ 0\rangle \rightarrow  182^1\rangle$ | 10685.8685 | 1664.398 | 276.7 | 0.003471 |

|    |                                       |            |          |       |          |
|----|---------------------------------------|------------|----------|-------|----------|
| 52 | $ 0\rangle \rightarrow  183^1\rangle$ | 10710.7534 | 1689.283 | 2575  | 0.03228  |
| 53 | $ 0\rangle \rightarrow  184^1\rangle$ | 10719.9502 | 1698.48  | 235.3 | 0.002962 |
| 54 | $ 0\rangle \rightarrow  185^1\rangle$ | 10722.9216 | 1701.452 | 263.2 | 0.003398 |
| 55 | $ 0\rangle \rightarrow  187^1\rangle$ | 11147.7066 | 2126.237 | 177.4 | 0.002225 |

## S8. Assignment of FCHT simulation of $(PP-H)^-$ under vertical gradient approximation

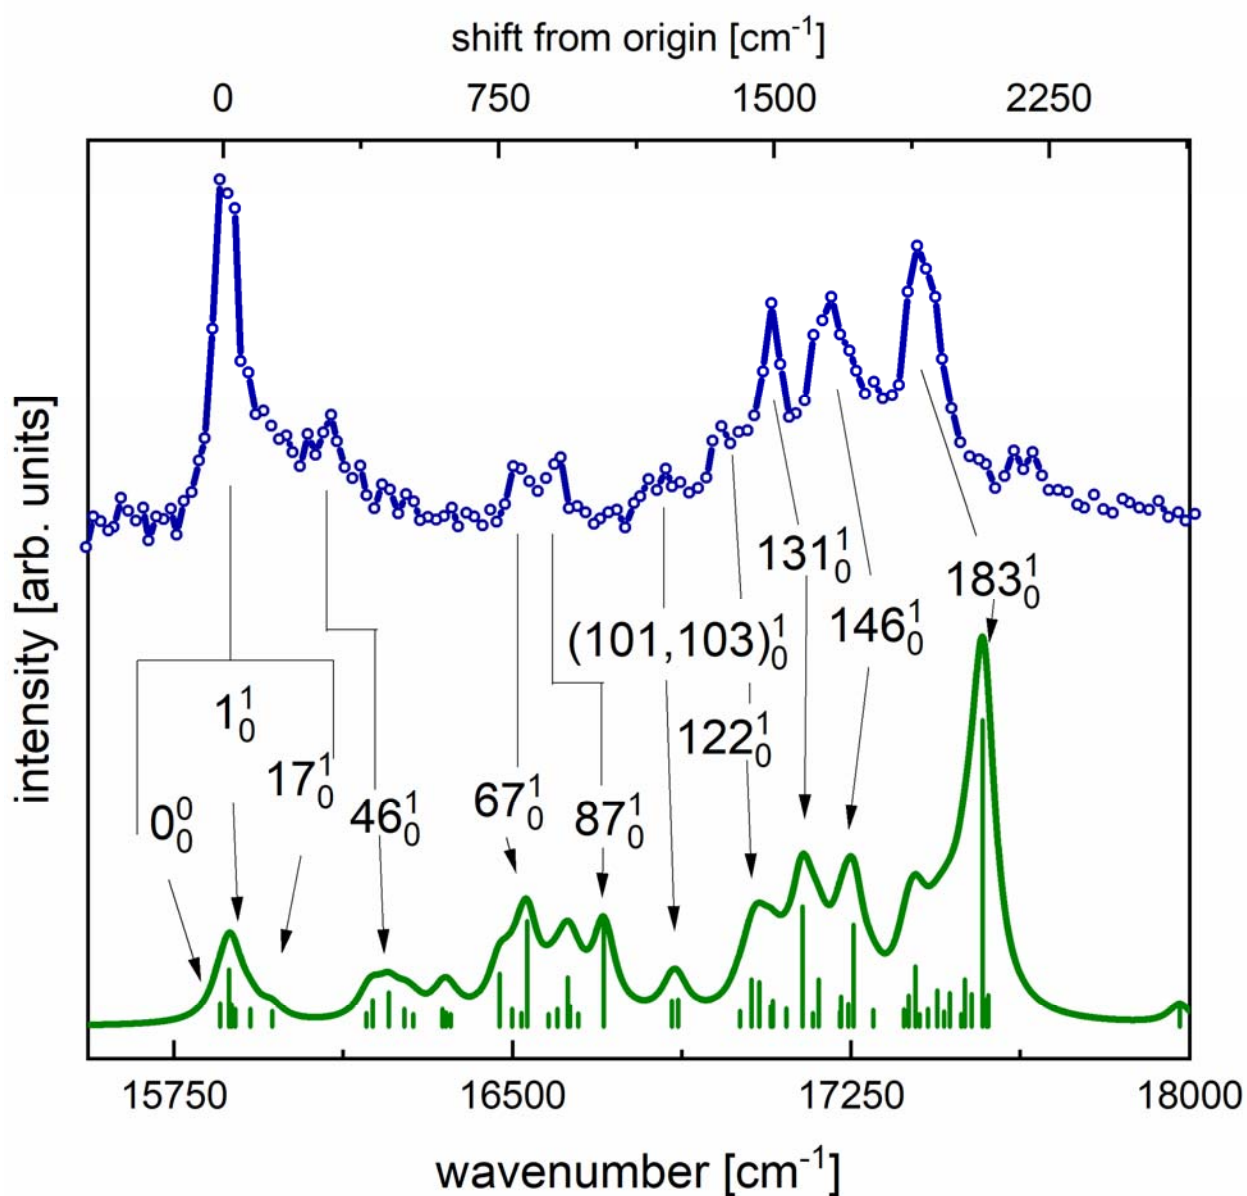

Supplement: d0cp03614e1.pdf [file d0cp03614e1.pdf]
