# Supplementary material for: Intrinsic electronic spectra of cryogenically prepared protoporphyrin IX ions in vacuo – deprotonation-induced Stark shifts
Source: Royal Society of Chemistry journal article supplement (doi:10.1039/d0cp03614e), 2020-01-01

# **Intrinsic Electronic Spectrum of Cryogenically Prepared Protoporphyrin IX Ions in Vacuo – Deprotonation-Induced Stark Shifts**

## **Electronic Supplementary Information: Animations of Key Vibrational Modes**

*Wyatt Zagorec-Marks,<sup>1,2</sup> James E. T. Smith<sup>2</sup>, Madison M. Foreman,<sup>1,2</sup> Sandeep Sharma<sup>2</sup>, J. Mathias Weber<sup>1,2,\*</sup>*

<sup>1</sup>JILA, University of Colorado, Boulder, CO 80309, USA.

<sup>2</sup>Department of Chemistry, University of Colorado, Boulder, CO 80309, USA.

**Note: To see animations, use presentation mode!**

# Porphine Modes

$\nu_7 : 152.84 \text{ cm}^{-1}$

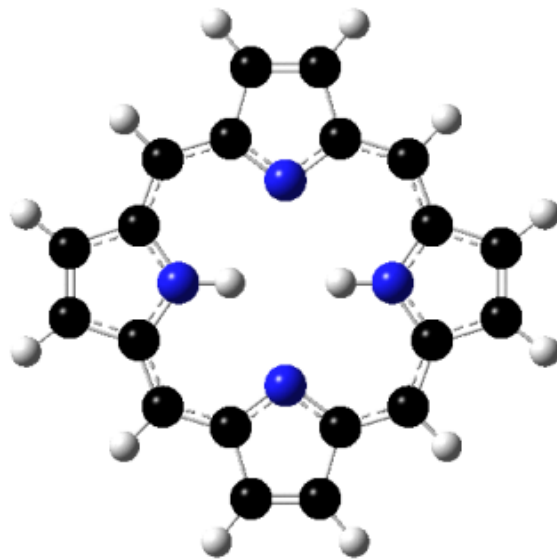

# Porphine Modes

$\nu_{13} : 311.28 \text{ cm}^{-1}$

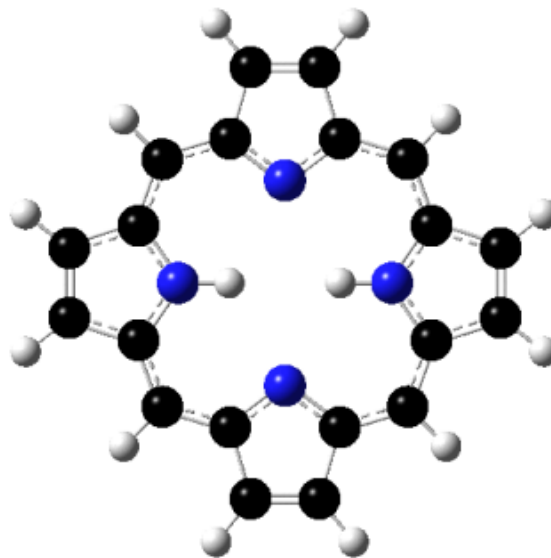

# Porphine Modes

$\nu_{33} : 733.57 \text{ cm}^{-1}$

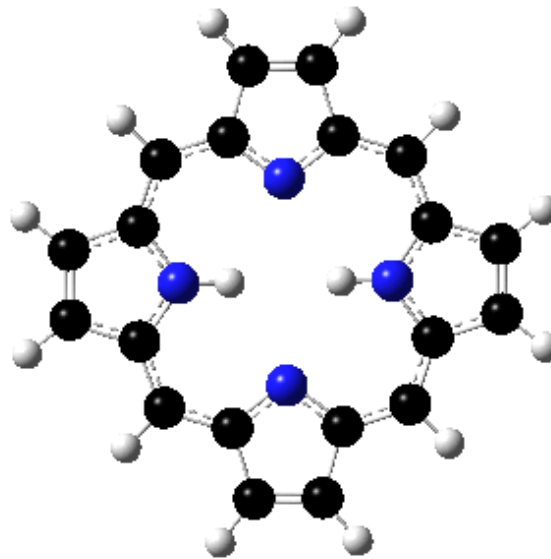

# Porphine Modes

$\nu_{41} : 799.02 \text{ cm}^{-1}$

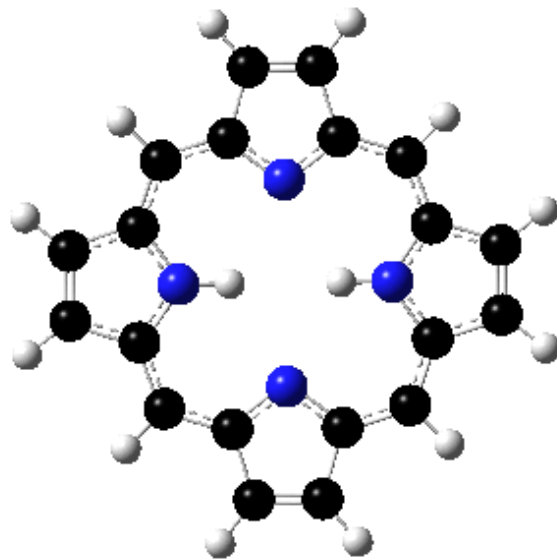

# Porphine Modes

$\nu_{53} : 977.64 \text{ cm}^{-1}$



# Porphine Modes

$\nu_{61} : 1095.49 \text{ cm}^{-1}$

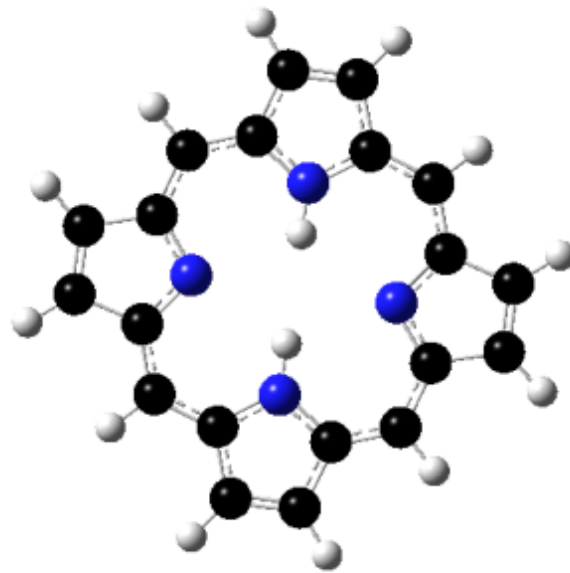

# Porphine Modes

$\nu_{68} : 1209.41 \text{ cm}^{-1}$





# Porphine Modes

$\nu_{70} : 1278.77 \text{ cm}^{-1}$

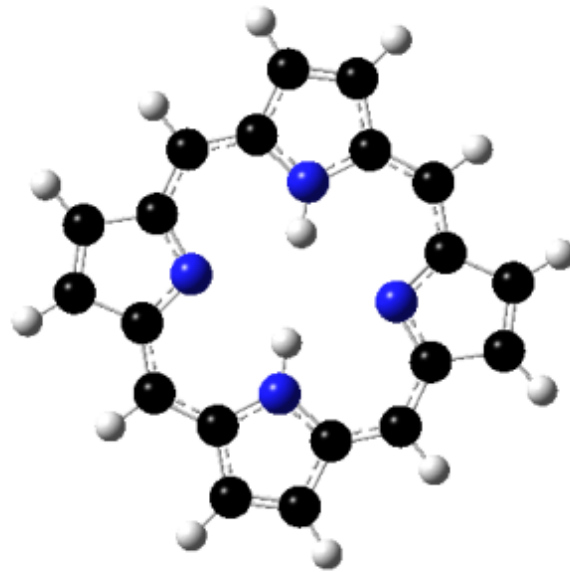

# Porphine Modes

$\nu_{75} : 1390.96 \text{ cm}^{-1}$



# Porphine Modes

$\nu_{91} : 1640.94 \text{ cm}^{-1}$



# Protoporphyrin IX Modes

$\nu_1 : 19.81 \text{ cm}^{-1}$

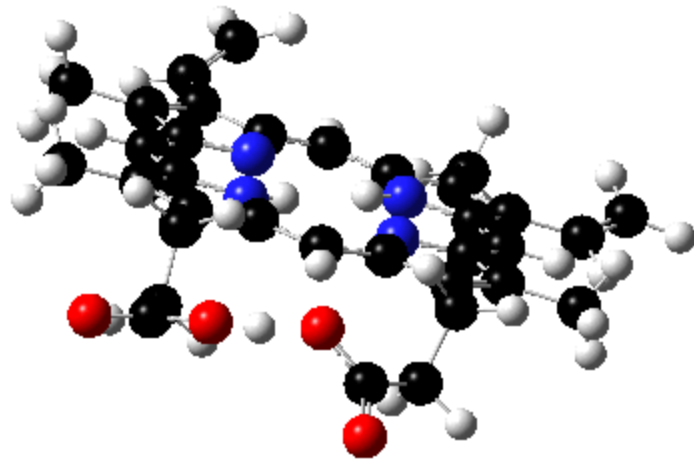

# Protoporphyrin IX Modes

$\nu_{17} : 115.60 \text{ cm}^{-1}$

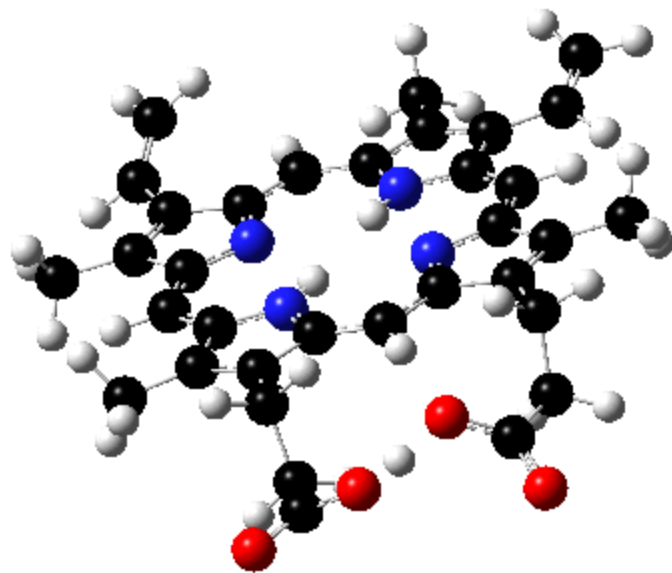

# Protoporphyrin IX Modes

$\nu_{46} : 373.48 \text{ cm}^{-1}$

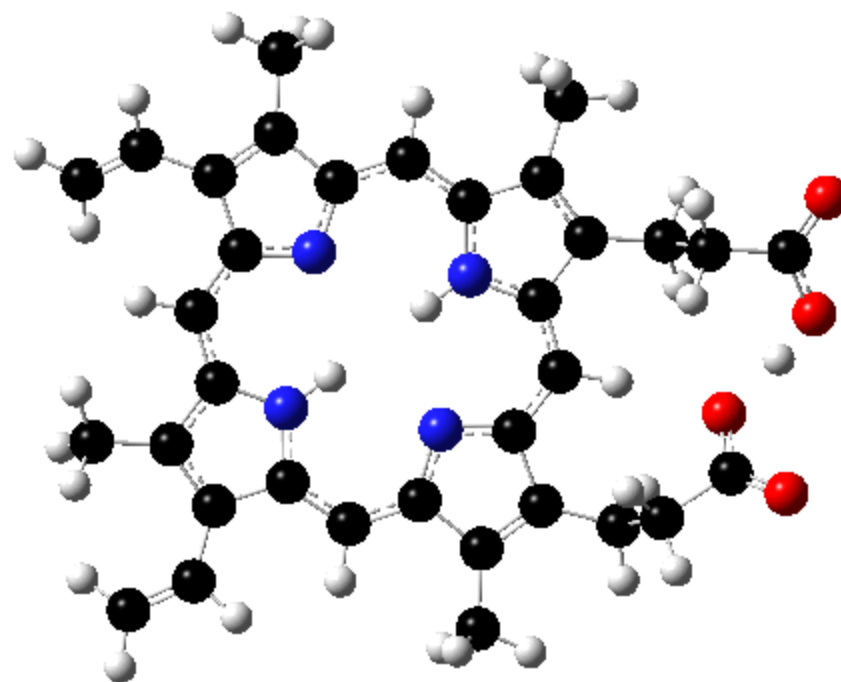

# Protoporphyrin IX Modes

$\nu_{67} : 679.86 \text{ cm}^{-1}$



# Protoporphyrin IX Modes

$\nu_{87} : 850.15 \text{ cm}^{-1}$





# Protoporphyrin IX Modes

$\nu_{101} : 1001.05 \text{ cm}^{-1}$



# Protoporphyrin IX Modes

$\nu_{103} : 1014.11 \text{ cm}^{-1}$



# Protoporphyrin IX Modes

$\nu_{122} : 1177.27 \text{ cm}^{-1}$

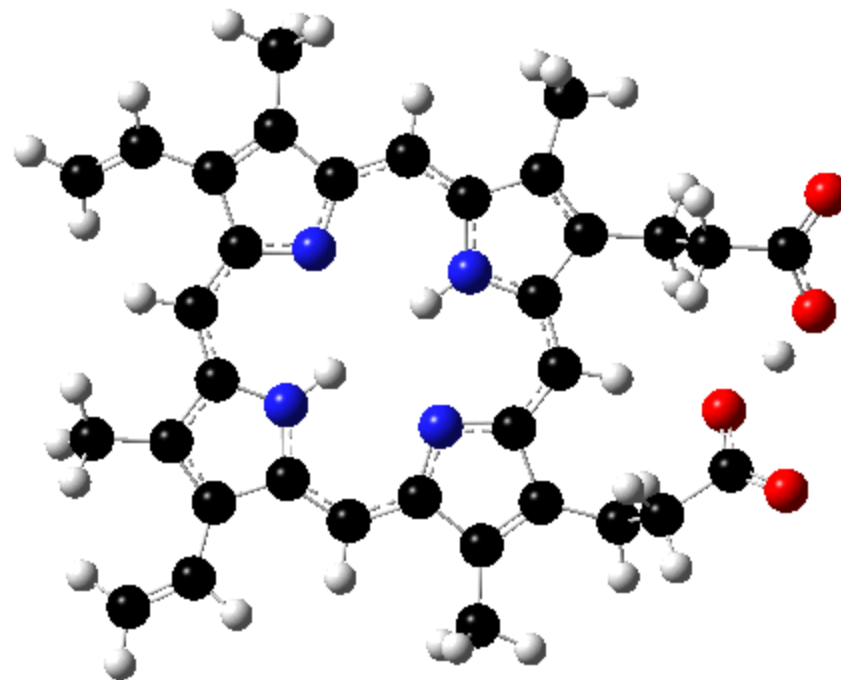

# Protoporphyrin IX Modes

$\nu_{131} : 1290.09 \text{ cm}^{-1}$



# Protoporphyrin IX Modes

$\nu_{146} : 1403.41 \text{ cm}^{-1}$



# Protoporphyrin IX Modes

$\nu_{183} : 1689.28 \text{ cm}^{-1}$



Supplement: d0cp03614e2.pdf [file d0cp03614e2.pdf]
